# Supplementary material for: Is the Public Ready for a Tobacco-Free Ireland? A National Survey of Public Knowledge and Attitudes to Tobacco Endgame in Ireland
Source: medRxiv preprint, doi:10.1101/2022.12.01.22282993, version 1 (2022-12-05)
Supplement: supplementary file [file 282993_file06.docx]

## Appendix A: Organogram of Stakeholder Consultations and Communications

*University of California San Francisco Center for Tobacco Control Research and Education and California Tobacco Control Program; **California Department of Public Health; HSE: Health Service Executive; TFI: Tobacco-Free Ireland; RCPI: Royal College of Physicians of Ireland; RCSI: Royal College of Surgeons in Ireland; TCD: Trinity College Dublin; HIQA: Health Information and Quality Authority.

## Appendix B: Survey Instrument

**Q.1.** Could I ask what age group you fall into?

| 15-17 | 1 |
| --- | --- |
| 18-24 | 2 |
| 25-34 | 3 |
| 35-44 | 4 |
| 45-54 | 5 |
| 55-64 | 6 |
| 65+ | 7 |

**Q.2.** Are you male or female?

| Male | 1 |
| --- | --- |
| Female | 2 |

**Q.3.** What region are you living in?

| Dublin | 1 |
| --- | --- |
| Rest of Leinster | 2 |
| Munster | 3 |
| Connaught/Ulster | 4 |

**Q.4.** To ensure we interview a wide cross-section of the public, could I first ask what the occupation of the chief income earner in your home is? (See glossary for definitions)

| Social Class A/B | 1 |
| --- | --- |
| Social Class C1 | 2 |
| Social Class C2 | 3 |
| Social Class D/E | 4 |
| Social Class F | 5 |

**Q.5.** What is the highest level of education you have completed to date?

| Completed primary school | 1 |
| --- | --- |
| Currently in secondary school | 2 |
| Completed secondary school | 3 |
| Currently at third level | 4 |
| Completed third level | 5 |
| No formal education | 6 |

**Q.6a** Do you smoke tobacco products? For the purposes of this survey, tobacco products do not include e-cigarettes. **READ OUT. SINGLE CODE**

| Yes | 1 |
| --- | --- |
| Yes, occasionaly | 2 |
| No | 3 |
| Don’t know | 4 |

**Q.6b** Which of the following statements BEST applies to you? **READ OUT. SINGLE CODE**

| I have never tried e-cigarettes | 1 |
| --- | --- |
| I have tried e-cigarettes but do not use them anymore | 2 |
| I have tried e-cigarettes and use them daily | 3 |
| I have tried e-cigarettes and still use them occasionally | 4 |
| Don’t know | 5 |

**Q.7a** Research shows that 18% of people aged 15 years and older in Ireland smoke. The Government of Ireland has a goal of becoming a tobacco-free country by 2025. This means reducing the proportion of Irish adults who smoke to less than 5%. Were you aware of this goal before now or were you not aware of this goal? **SINGLE CODE**

| Yes, aware | 1 |
| --- | --- |
| No, not aware | 2 |
|  |  |

**Q.7b** The ‘Tobacco-Free Ireland’ goal aims to reduce the proportion of Irish adults who smoke to less than 5% by 2025. Would you say you...... **READ OUT. SINGLE CODE. FLIP SCALE**

| Strongly support this goal | 1 |
| --- | --- |
| Support this goal | 2 |
| Are neutral about this goal | 3 |
| Oppose this goal | 4 |
| Strongly oppose this goal | 5 |
| Don’t know | 6 |

**Q.7c** Which of the following comes closest to your view - reducing smoking levels to less than 5% **READ OUT. SINGLE CODE. FLIP SCALE**

| Is achievable by 2025 | 1 |
| --- | --- |
| Is achievable but not until between 2026 and 2035 | 2 |
| Is achievable but not until between 2036 and 2050 | 3 |
| Is achievable but not until after 2050 | 4 |
| Is not achievable at all | 5 |
| Don’t know | 6 |

**Q.8a** Now I would like to talk about the role the government and the Health Service Executive (HSE) play in achieving Ireland’s Tobacco-Free Goal. To what extent do you agree or disagree with the following? **READ OUT. SINGLE CODE PER STATEMENT. ROTATE STATEMENTS. FLIP SCALE**

| **Sufficiency of national efforts** | **A** | **B** | **C** | **D** | **E** | **F** |
| --- | --- | --- | --- | --- | --- | --- |
| The Government should do more to tackle the harm done by smoking | 1 | 2 | 3 | 4 | 5 | 6 |
| The Government is doing enough to ensure that Ireland’s Tobacco-Free goal is achieved | 1 | 2 | 3 | 4 | 5 | 6 |
| The HSE is doing enough to tackle the harm done by smoking | 1 | 2 | 3 | 4 | 5 | 6 |

A: Strongly Agree; B: Somewhat agree; C: Neither Agree nor Disagree; D: Somewhat Disagree; E: Strongly Disagree; F: Don’t know

**Q.8b** Moving on, I am going to ask you about a number of potential measures that might help achieve the Tobacco-Free goal. To what extent do you agree or disagree with the following? **READ OUT. SINGLE CODE PER STATEMENT. ROTATE STATEMENTS. FLIP SCALE**

| **Views on Tobacco Endgame Measures** | **A** | **B** | **C** | **D** | **E** | **F** |
| --- | --- | --- | --- | --- | --- | --- |
| People should be required to hold an official licence to buy tobacco products | 1 | 2 | 3 | 4 | 5 | 6 |
| The number of places that can sell tobacco products should be reduced by 95% | 1 | 2 | 3 | 4 | 5 | 6 |
| Tobacco product sales should only be allowed in a limited number of specially licenced shops and banned from smaller local shops, newsagents, off-licences and petrol stations | 1 | 2 | 3 | 4 | 5 | 6 |
| Shops that sell tobacco products should be required to display information that encourages tobacco users to quit | 1 | 2 | 3 | 4 | 5 | 6 |
| People working in shops that sell tobacco products should be required to undergo training to enable them to provide quitting advice to tobacco users | 1 | 2 | 3 | 4 | 5 | 6 |
| The government should raise the legal age of purchasing tobacco products to 21 years and older | 1 | 2 | 3 | 4 | 5 | 6 |
| The government should prevent everyone who is currently under 18 from ever buying tobacco products for the rest of their lives | 1 | 2 | 3 | 4 | 5 | 6 |
| Tobacco product sales should be banned near playgrounds, schools and university campuses | 1 | 2 | 3 | 4 | 5 | 6 |
| There should be a ban on smoking cigarettes, roll-your-own cigarettes, cigars, and little cigars and cigarillos in public places | 1 | 2 | 3 | 4 | 5 | 6 |
| Tobacco products should only be sold during restricted hours of the day | 1 | 2 | 3 | 4 | 5 | 6 |
| The Government should increase the tax on tobacco products by 20% a year until less than 5% of people smoke | 1 | 2 | 3 | 4 | 5 | 6 |
| Tobacco products should be more tightly regulated | 1 | 2 | 3 | 4 | 5 | 6 |
| The amount of nicotine in tobacco products should be reduced through new laws to make tobacco products less addictive | 1 | 2 | 3 | 4 | 5 | 6 |
| Filters on cigarettes and other combustible tobacco products should be banned to make the products more difficult to tolerate | 1 | 2 | 3 | 4 | 5 | 6 |
| Added chemicals that make cigarettes seem less harsh should be banned to make cigarettes more difficult to tolerate | 1 | 2 | 3 | 4 | 5 | 6 |
| Individual health warnings should be required to be printed on all individual cigarette sticks | 1 | 2 | 3 | 4 | 5 | 6 |

A: Strongly Agree; B: Somewhat agree; C: Neither Agree nor Disagree; D: Somewhat Disagree; E: Strongly Disagree; F: Don’t know

**Q.8bi** Which of the following, if any, comes closest to your own view on the sale of tobacco products? **READ OUT. SINGLE CODE. ROTATE. FLIP CODES. INTERVIEWER INSTRUCTION: IF RESPONDENT ASKS, PHASING OUT OF TOBACCO SALES MEANS THE SALE OF TOBACCO PRODUCTS IN IRELAND WOULD BE GRADUALLY DISCONTINUED.**

| Tobacco product sales should be phased out | 1 |
| --- | --- |
| Tobacco product sales should be phased out but only if the government provides assistance to help smokers to quit | 2 |
| Tobacco product sales should be phased out but only if existing smokers can continue to buy tobacco products using a licence | 3 |
| Tobacco product sales should be phased out but only if the government provides assistance to help smokers to quit AND existing smokers can continue to buy tobacco products using a licence | 4 |
| Tobacco product sales should not be phased out | 5 |
| None of these/other option | 6 |
| Don’t know | 7 |

**Q.8bii** Over how many years do you think tobacco product sales should be phased out? *_________years*

Over less than one year...................................................................98

Don’t know......................................................................................99

**Q.8c** Now I would like to discuss measures which target the tobacco industry. To

what extent do you agree or disagree with the following? **READ OUT. SINGLE CODE**

**PER STATEMENT. ROTATE STATEMENTS. FLIP SCALE**

| **Views on Industry Focused Tobacco-Endgame Measures** | **A** | **B** | **C** | **D** | **E** | **F** |
| --- | --- | --- | --- | --- | --- | --- |
| Tobacco companies should be required to pay the state for the health costs due to the harm caused by tobacco products | 1 | 2 | 3 | 4 | 5 | 6 |
| Representatives linked to the tobacco industry should be banned from meeting with government officials | 1 | 2 | 3 | 4 | 5 | 6 |

A=Strongly Agree; B=Somewhat agree; C=Neither Agree nor Disagree; D=Somewhat Disagree; E=Strongly Disagree; F=Don’t know

**Q.8d** Moving on to regulatory measures for e-cigarettes. To what extent do you agree or disagree with the following? **READ OUT. SINGLE CODE PER STATEMENT. ROTATE STATEMENTS. FLIP SCALE**

| **Views on E-cigarette Restrictions** | **A** | **B** | **C** | **D** | **E** | **F** |
| --- | --- | --- | --- | --- | --- | --- |
| E-cigarettes should only be available over the counter through pharmacies | 1 | 2 | 3 | 4 | 5 | 6 |
| E-cigarettes should only be available by prescription from a doctor | 1 | 2 | 3 | 4 | 5 | 6 |
| The amount of nicotine in e-cigarettes and/or e-liquid should be limited so they are less addictive | 1 | 2 | 3 | 4 | 5 | 6 |

A=Strongly Agree; B=Somewhat agree; C=Neither Agree nor Disagree; D=Somewhat Disagree; E=Strongly Disagree; F=Don’t know

## Appendix C: Data Dictionary

| No. | **Variable** | **Type of variable** | **Description** | **Original Coding** | **Recoding** |
| --- | --- | --- | --- | --- | --- |
| 1. | Age (years) | Categorical | Age group of participant | 1=15-17, 2=18-24, 3=25-34, 4=35-44, 5=45-54, 6=55-64, 7=65+ | 1=15-24 (1,2), 2=25-44 (3,4), 3=45-64 (5,6), 4=65+ (7) |
| 2. | Gender | Categorical | Gender of participant | 1=Male, 2=Female | 0=Female (2), 1=Male (1) |
| 3. | Region | Categorical | Region where participant resides | 1=Dublin, 2=Rest of Leinster, 3=Munster, 4=Connaught/Ulster | 0=Leinster (1,2), 1=Munster (3), 2=Connaught/Ulster (4) |
| 4. | Social class | Categorical | Social class of participant | 1=AB, 2=C1, 3=C2, 4=DE, 5=F | 0=Higher (1,2), 1=Lower (3,4),  2=Farmer (5) |
| 5. | Educational attainment | Categorical | Highest level of education attained | 1=Completed primary school, 2=Currently in secondary school, 3=Completed secondary school, 4=Currently at third level, 5=Completed third level, 6=No formal education | 0=Higher (5), 1=Lower (1-4,6) |
| 6. | Current smoking status | Categorical | Whether participant currently smokes cigarettes or tobacco products | 1=Yes daily smoker, 2=Yes occasionally, 3=No, 4=Don’t know | 0=Non-smoker (3),  1=Smoker (1,2),  Missing=Don’t know (4) |
| 7. | Current E-cigarette use status | Categorical | Whether participant currently uses e-cigarettes | 1=I have never tried e-cigarettes, 2=I have tried e-cigarettes but do not use them anymore, 3=I have tried e-cigarettes and use them daily, 4=I have tried e-cigarettes and use them occasionally, 5=Don’t know | 0=Non-e-cigarette user (1,2), 1=E-cigarette user (3,4), Missing=Don’t know (5) |
| 8. | Current tobacco/e-cigarette use status | Categorical | Whether participant currently uses tobacco products or e-cigarettes | Composite variable derived from variables 6. And 7. | 0=Non-tobacco/e-cigarette user, 1=Tobacco/e-cigarette user, Missing=Don’t know |
| 9. | TFI goal awareness | Categorical | Whether participant is aware of TFI goal | 1=Yes, aware, 2=No, not aware | 0=Not aware (2), 1=Aware (1) |
| 10. | TFI goal support | Categorical | Whether participant supports the TFI goal | 1=Strongly agree, 2=Somewhat agree, 3=Neither agree nor disagree, 4=Somewhat disagree, 5=Strongly disagree, 6=Don’t know | 0=No support (3,4,5,6), 1=Support (1,2) |
| 11. | TFI goal perceived achievability | Categorical | Whether participant believes the TFI goal is achievable | 1=Is achievable by 2025, 2=Is achievable but not until between 2026 and 2035, 3=Is achievable but not until between 2036 and 2050, 4=Is achievable but not until after 2050, 5=Is not achievable at all, 6=Don’t know | 0=Not achievable/Don’t know (5,6), 1=Achievable (1,2,3,4) |

**Appendix C (Continued)**

| No. | **Variable** | **Type of variable** | **Description** | **Original Coding** | **Recoding** |
| --- | --- | --- | --- | --- | --- |
| 12. | TFI goal achievability timeframe | Categorical | Timeframe by which participant believes the TFI goal is achievable | As above | 1=Is achievable by 2025, 2=Is achievable but beyond 2025, 3=Is not achievable/Don’t know |
| 13. | View on government action on smoking-related harm | Categorical | Whether participant agreed government should do more to tackle smoking-related harm | 1=Strongly agree, 2=Somewhat agree, 3=Neither agree nor disagree, 4=Somewhat disagree, 5=Strongly disagree, 6=Don’t know | 0=Do not agree/Don’t know (3,4,5,6), 1=Agree (1,2) |
| 14. | View on HSE action on smoking-related harm | Categorical | Whether participant agreed the HSE is doing enough to tackle smoking-related harm | 1=Strongly agree, 2=Somewhat agree, 3=Neither agree nor disagree, 4=Somewhat disagree, 5=Strongly disagree, 6=Don’t know | 0=Do not agree/Don’t know (3,4,5,6), 1=Agree (1,2) |
| 15. | View on government commitment to TFI goal | Categorical | Whether participant agreed Government is doing enough to ensure TFI is achieved | 1=Strongly agree, 2=Somewhat agree, 3=Neither agree nor disagree, 4=Somewhat disagree, 5=Strongly disagree, 6=Don’t know | 0=Do not agree/Don’t know (3,4,5,6), 1=Agree (1,2) |
| 16.-37. | Support for 21 component endgame measures (as outlined in Appendix F) | Categorical | Whether participant supported proposed endgame measures | 1=Strongly agree, 2=Somewhat agree, 3=Neither agree nor disagree, 4=Somewhat disagree, 5=Strongly disagree, 6=Don’t know | 0=No Support (3,4,5,6), 1=Support (1,2) |
| 38. | Support for a tobacco sales phase-out | Categorical | Whether participants supported a tobacco sales phase-out | 1=Support with no conditions, 2=Support if the government provides assistance to help smokers to quit, 3=Support but only if existing smokers can continue to buy tobacco products using a licence, 4=Support but only if conditions in both 2. and 3. are met , 5=Does not support , 6=Don’t know | 0=No support(5,6), 1=Support (1,2,3,4) |
| 39. | Acceptable phase-out timeline | Categorical | Timeframe within which participants supported a tobacco sales phase-out | Enter as given, 11=11 years or longer, 12=less than 1 year, 13=Don’t know | 1=0-5 years, 2=6-10 years, 3=>10 years, 4=Don’t know |

## Appendix D: Support for Tobacco Endgame Measures*

| **Measure** | **Total**  **n (%, 95% CI)** | ***Tobacco/e-cigarette User***  ***n (%)*** | ***Non-Tobacco/e-cigarette User***  ***n (%)*** | ***P-value*** |
| --- | --- | --- | --- | --- |
| ***Lowering the nicotine content in tobacco products*** | **(N=1,000)** | ***(N=182)*** | ***(N=802)*** |  |
| Support | 861 (86.1, 84.0-88.2) | *149 (77.6)* | *707 (88.2)* | *<0.001* |
| No Support | 139 (13.9, 11.8-16.0) | *43 (22.4)* | *95 (11.8)* |
| ***Lowering the nicotine content in e-cigarettes*** |  |  |  |  |
| Support | 856 (85.6, 83.4-87.8) | *144 (75.0)* | *708 (88.3)* | *<0.001* |
| No Support | 144 (14.4, 12.2-16.6) | *48 (25.0)* | *94 (11.7)* |
| ***Tighter regulation of tobacco products*** |  |  |  |  |
| Support | 790 (79.0, 76.5-81.5) | 121 (63.0) | 666 (83.0) | *<0.001* |
| No Support | 210 (21.0, 18.5-23.5) | 71 (37.0) | 136 (17.0) |
| ***Ban on added chemicals that make cigarettes seem less harsh*** |  |  |  |  |
| Support | 692 (69.2, 66.3-72.1) | *116 (60.4)* | *573 (71.4)* | *0.003* |
| No Support | 308 (30.8, 27.9-33.7) | *76 (39.6)* | *229 (28.6)* |
| ***Requiring individual health warnings on all individual cigarette sticks*** |  |  |  |  |
| Support | 639 (63.9, 60.9-66.9) | *97 (50.5)* | *540 (67.3)* | *<0.001* |
| No Support | 361 (36.1, 33.1-39.1) | *95 (49.5)* | *262 (32.7)* |
| ***Banning filters on cigarettes and other combustible tobacco products*** |  |  |  |  |
| Support | 513 (51.3, 48.2-54.4) | *67 (34.9)* | *445 (55.5)* | *<0.001* |
| No Support | 487 (48.7, 45.6-51.8) | *125 (65.1)* | *357 (44.5)* |
| ***Requiring tobacco companies to pay the state for the health costs due to tobacco-related harm*** |  |  |  |  |
| Support | 784 (78.4, 75.9-81.0) | *113 (58.9)* | *666 (83.0)* | *<0.001* |
| No Support | 216 (21.6, 19.1-24.2) | *79 (41.1)* | *136 (17.0)* |

**Appendix D (continued)**

| **Measure** | **Total**  **n (%, 95% CI)** | ***User***  ***n (%)*** | ***Non- User***  ***n (%)*** | ***P-value*** |
| --- | --- | --- | --- | --- |
| ***Banning tobacco industry representatives meeting with government*** | **(N=1,000)** | ***(N=182)*** | ***(N=802)*** |  |
| Support | 522 (52.2, 49.1-55.3) | *90 (46.9)* | *429 (53.5)* | *0.099* |
| No Support | 478 (47.8, 44.7-50.9) | *102 (53.1)* | *373 (46.5)* |
| ***Banning tobacco product sales near playgrounds, schools and universities*** |  |  |  |  |
| Support | 782 (78.2, 75.6-80.8) | *135 (70.3)* | *645 (80.4)* | *0.002* |
| No Support | 218 (21.8, 19.2-24.4 | *57 (29.7)* | *157 (19.6)* |
| ***“Tobacco 21” policy*** |  |  |  |  |
| Support | 706 (70.6, 67.8-73.4) | *124 (64.2)* | *581 (72.4)* | *0.024* |
| No Support | 294 (29.4, 26.6-32.2) | *69 (35.8)* | *221 (27.6)* |
| ***Ban on smoking tobacco products in public places*** |  |  |  |  |
| Support | 643 (64.3, 61.3-67.3) | *68 (35.4)* | *570 (71.1)* | *<0.001* |
| No Support | 357 (35.7, 32.7-38.7) | *124 (64.6)* | *232 (28.9)* |
| ***Tax increases of 20%+ per year until <5% of the population smoke*** |  |  |  |  |
| Support | 596 (59.6, 56.6-62.6) | *55 (28.6)* | *539 (67.2)* | *<0.001* |
| No Support | 404 (40.4, 37.4-43.4) | *137 (71.4)* | *263 (32.8)* |
| ***“Tobacco-Free Generation” policy*** |  |  |  |  |
| Support | 560 (56.0, 52.9-59.1) | *78 (40.4)* | *480 (59.9)* | *<0.001* |
| No Support | 440 (44.0, 40.9-47.1) | *115 (59.6)* | *322 (40.1)* |
| ***Tobacco user-licence*** |  |  |  |  |
| Support | 403 (40.3, 37.3-43.4) | *65 (33.9)* | *334 (41.6)* | *0.048* |
| No Support | 597 (59.7, 56.7-62.7) | *127 (66.1)* | *468 (58.4)* |
| ***Complete phase-out of tobacco product sales*** |  |  |  |  |
| Support | 828 (82.8, 80.5-85.1) | *140 (72.9)* | *686 (85.5)* | *<0.001* |
| No Support | 172 (17.2, 14.9-19.5) | *52 (27.1)* | *116 (14.5)* |

**Appendix D (continued)**

| **Measure** | **Total**  **n (%, 95% CI)** | ***User***  ***n (%)*** | ***Non-User***  ***n (%)*** | ***P-value*** |
| --- | --- | --- | --- | --- |
|  | **(N=1,000)** | ***(N=182)*** | ***(N=802)*** |  |
| ***Requiring tobacco retailers to display information encouraging users to quit*** |  |  |  |  |
| Support | 819 (81.9, 79.5-84.3) | *144 (75.0)* | *672 (83.8)* | *0.004* |
| No Support | 181 (18.1, 15.7-20.5) | *48 (25.0)* | *130 (16.2)* |
| ***Restricting e-cigarette sales to over the counter sales in pharmacies*** |  |  |  |  |
| Support | 643 (64.3, 61.3-67.3) | *85 (44.3)* | *554 (69.1)* | *<0.001* |
| No Support | 357 (35.7, 32.7-38.7) | *107 (55.7)* | *248 (30.9)* |
| ***Allowing tobacco sales in a limited number of specially licenced shops*** |  |  |  |  |
| Support | 630 (63.0, 60.0-66.0) | *77 (40.1)* | *550 (68.6)* | *<0.001* |
| No Support | 370 (37.0, 34.0-40.0) | *115 (59.9)* | *252 (31.4)* |
| ***Reducing the number of places that can sell tobacco products by 95%*** |  |  |  |  |
| Support | 589 (58.9, 55.9-62.0) | *74 (38.3)* | *513 (64.0)* | *<0.001* |
| No Support | 411 (41.1, 38.1-44.2) | *119 (61.7)* | *289 (36.0)* |
| ***Restricting tobacco product sales to restricted hours of the day*** |  |  |  |  |
| Support | 501 (50.1, 47.0-53.2) | *61 (31.6)* | *437 (54.5)* | *<0.001* |
| No Support | 499 (49.9, 46.8-53.0) | *132 (68.4)* | *365 (45.5)* |
| ***Requiring workers that sell tobacco to undergo training to provide quitting advice*** |  |  |  |  |
| Support | 459 (45.9, 42.8-49.0) | *80 (41.5)* | *377 (47.1)* | *0.160* |
| No Support | 541 (54.1, 51.0-57.2) | *113 (58.5)* | *424 (52.9)* |
| ***Restricting e-cigarette sales to prescription-only access*** |  |  |  |  |
| Support | 432 (43.2, 40.1-46.3) | *62 (32.1)* | *368 (45.9)* | *0.001* |
| No Support | 568 (56.8, 53.7-59.9) | *131 (67.9)* | *433 (54.1)* |

User: tobacco/e-cigarette user; Non-user: non-tobacco/e-cigarette user; *Results are weighted and may not sum to totals.

## Appendix E: Summary of Public Support Levels for Tobacco Endgame Measures

|  |  | Support* | | |
| --- | --- | --- | --- | --- |
| Category | Tobacco Endgame Measure | Total sample | Tobacco/e-cigarette users | Non-users |
| Product-Focused | Lowering the nicotine content in tobacco products | High | High | High |
| Lowering the nicotine content in e-cigarettes | High | High | High |
| Tighter regulation of tobacco products | High | Majority | High |
| Ban on added chemicals that make cigarettes seem less harsh | Majority | Majority | High |
| Requiring individual health warnings on all individual cigarette sticks | Majority | Majority | Majority |
| Banning filters on cigarettes and other combustible tobacco products | Majority | Low | Majority |
| Institutional Structure-Focused | Requiring tobacco companies to pay for tobacco-related health costs due to tobacco-related harm | High | Majority | High |
| Banning tobacco industry representatives meeting with government | Majority | Low | Majority |
| User-Focused | Banning tobacco product sales near playgrounds, schools and universities | High | High | High |
| “Tobacco 21” policy | High | Majority | High |
| Ban on smoking tobacco products in public places | Majority | Low | High |
| Tax increases of 20%+ per year until <5% of the population smoke | Majority | Low | Majority |
| “Tobacco-Free Generation” policy | Majority | Low | Majority |
| Tobacco user-licence | Low | Low | Low |
| Supply-Focused | Complete phase-out of tobacco product sales | High | High | High |
| Requiring tobacco retailers to display information encouraging users to quit | High | High | High |
| Restricting e-cigarette sales to over the counter sales in pharmacies | Majority | Low | Majority |
| Allowing tobacco sales in a limited number of specially licenced shops | Majority | Low | Majority |
| Reducing the number of places that can sell tobacco products by 95% | Majority | Low | Majority |
| Restricting tobacco product sales to restricted hours of the day | Majority | Low | Majority |
| Requiring tobacco sales staff to undergo training to provide quitting advice | Low | Low | Low |
| Restricting e-cigarette sales to prescription-only access | Low | Low | Low |

*Levels of support are defined as follows: High = ≥70%; Majority = >50% - <70%; Low = 0-50%.
